# 1                    **Neural Flip-Flops III: Stomatogastric Ganglion**

2    Lane Yoder

3    Department of Science and Mathematics, retired

4    University of Hawaii, Kapiolani

5    Honolulu, Hawaii

6    [LYoder@hawaii.edu](mailto:LYoder@hawaii.edu)

7    [NeuralNanoNetworks.com](http://NeuralNanoNetworks.com)

## 8 **Abstract**

9           The stomatogastric ganglion (STG) is a group of about 30 neurons that resides  
10 on the stomach in decapod crustaceans. Its two central pattern generators (CPGs)  
11 control the chewing action of the gastric mill and the peristaltic movement of food  
12 through the pylorus to the gut. The STG has been studied extensively because it has  
13 properties that are common to all nervous systems and because of the small number of  
14 neurons and other features that make it convenient to study. So many details are  
15 known that the STG is considered a classic test case in neuroscience for the reductionist  
16 strategy of explaining the emergence of macro-level phenomena from micro-level data.  
17 In spite of the intense scrutiny the STG has received, how it generates its rhythmic  
18 patterns of bursts remains unknown.

19           The explicit neural networks proposed here model the pyloric CPG of the  
20 American lobster (*Homarus americanus*). The models share enough significant  
21 features with the lobster's CPG that they may be considered first approximations, or  
22 perhaps simplified versions, of STG architecture. The similarities include 1) mostly  
23 inhibitory synapses; 2) pairs of cells with reciprocal inhibitory inputs, complementary  
24 outputs that are approximately 180 degrees out of phase, and state changes occurring  
25 with the high output changing first; 3) cells that have reciprocal, inhibitory inputs with  
26 more than one other cell; and 4) six cells that produce coordinated oscillations with the  
27 same period, four phases distributed approximately uniformly over the period, and half  
28 of the burst durations approximately 1/4 of the period and the other half 3/8.

29           Each model's connectivity is explicit, and its operation depends only on  
30 minimal neuron capabilities of excitation and inhibition. One model performs a  
31 function that fills a gap in standard ring oscillators. It is apparently new to engineering,  
32 making it an example of neuroscience and logic circuit design informing each other.

33           Some models are derived from standard circuit designs by moving each  
34 negation symbol from one end of a connection to the other. This does not change the  
35 logic of the network, but it changes each logic gate to one that can be implemented  
36 with a single neuron.

37 **Key words:** stomatogastric ganglion; STG; central pattern generator; CPG; pylorus;  
38 flip-flop; JK flip-flop; oscillator; toggle; bursting neuron; explicit neural model;  
39 neuronal network.  
40

## 41 **1. Introduction**

42           This article is the sixth in a series of articles that show how neurons are likely to  
43 be connected to perform certain brain functions. The first three articles [1-3] showed  
44 how a fuzzy logic decoder can generate the phenomena central to color vision and  
45 olfaction and can account for major aspects of the anatomical structure and  
46 physiological organization of the neocortex. The next two articles [4, 5] showed how  
47 Boolean logic neural flip-flops (NFFs) and NFFs configured as central pattern  
48 generators (CPGs) can produce detailed characteristics of short-term memory and  
49 electroencephalography.

50           The present article presents several novel CPG designs that show how neurons  
51 can be connected to produce rhythmic bursts that closely match the oscillations  
52 produced by the American lobster's pyloric CPG. These logic circuits are some of the  
53 simplest oscillators that can be constructed with components whose only active  
54 properties are excitation and inhibition. All of them produce oscillations that are close  
55 to the pyloric CPG in phases and burst durations. This supports the hypothesis that the  
56 pyloric CPG is fundamentally similar in design to one or more of the models. None of  
57 the models is an exact match, and each is close to the pyloric in different ways. The  
58 additional complexity of the pyloric CPG apparently alters the signals slightly.

59           The novel flip-flop ring oscillator proposed here is a generalization of the  
60 standard inverter ring oscillator, which is composed of an odd number of inverters  
61 connected in a ring. A flip-flop ring is composed of two or more of the simplest flip-  
62 flops, with both outputs of each flip-flop connected as inputs to the next one. Flip-flop  
63 rings fill a gap in the patterns produced by inverter rings. The two ring types produce,  
64 respectively, even and odd numbers of oscillations, with their phases distributed

65 approximately uniformly over one cycle. An inverter ring could not produce the four  
66 pyloric oscillations of the American lobster.

67         The model CPGs can be implemented with neurons or electronic hardware.  
68 The models were simulated with minimal properties of neuron properties of excitation  
69 and inhibition and with electronic circuit simulation software. The neural and  
70 electronic simulations returned virtually identical results. The close fits between the  
71 electronic simulations and pyloric oscillations are a remarkable convergence of  
72 phenomena generated by any two different mechanisms, but especially for mechanisms  
73 that are so different in materials (electronic hardware versus lobster neurons), network  
74 complexity (16 or 24 transistors, connected in simple, repeating patterns, versus the  
75 more complex pyloric CPG), design methods (modern engineering versus natural  
76 selection) and speed (the electronic and lobster frequencies differ by a factor of about  
77 17 million). The similar results, along with the similar operational properties of the  
78 components and similar connectivity between components, suggest the results are  
79 produced in the same way, at least in principle if not in the details.

80         A few other concepts presented here are also likely to be new:

81         Neurons are well known to have a thousand or more connections. It is shown  
82 here how complex logic circuits can be implemented with a few neurons and many  
83 synapses.

84         Some of the neural networks presented here can be derived from standard logic  
85 circuit designs by the simple transformation of moving each negation symbol from one  
86 end of a connection to the other. Many more networks that can be implemented with  
87 neurons can be derived by this simple method and may explain more nervous system  
88 functions. Although the modifications are minor, both the method and the derived  
89 networks are likely to be new to engineering, as well as to neuroscience.

90           The observation that the burst centers of four of the American lobster's pyloric  
91 oscillations are approximately uniformly distributed over the period is apparently new.  
92 The different models presented here show that a CPG can produce oscillations with  
93 phases uniformly distributed at the burst centers, at the burst onsets, or both.

94           Two of the model CPGs demonstrate how a neuron (or an electronic logic gate)  
95 can produce useful functions with reciprocal, inhibitory inputs with more than one  
96 other neuron. The STG has several such neurons. Although pairs of logic gates with  
97 reciprocal, inhibitory inputs are quite common in electronic logic circuits, electronic  
98 gates apparently do not have reciprocal, inhibitory inputs with more than one other  
99 gate.

100           Several testable predictions are given here, and STG phenomena are shown to  
101 support several predictions of neural flip-flops that were given in a previous paper on  
102 short-term memory.

## 103 **2. Methods**

### 104 **2.1. Neural Boolean logic**

105           All Boolean logic results for the networks presented here follow from the  
106 neuron responses to binary (high and low) input signals, given in two tables below, and  
107 the algebra of Boolean logic applied to the networks' connections. Analog signals  
108 (intermediate strengths between high and low) were considered in [4, 5] only to show  
109 how NFFs can generate robust binary signals in the presence of moderate levels of  
110 additive noise in binary inputs. That discussion will not be repeated here.

### 111 **2.1.1. Binary neuron signals**

112 Neuron signal strength, or intensity, is normalized here by dividing it by the  
113 maximum possible intensity for the given level of adaptation. This puts intensities in  
114 the interval from 0 to 1, with 0 meaning no signal and 1 meaning the maximum  
115 intensity. The normalized number is called the *response intensity* or simply the  
116 *response* of the neuron. Normalization is only for convenience. Non-normalized  
117 signal strengths, with the highest and lowest values labeled Max & Min rather than 1  
118 and 0, would do as well.

119 The responses 1 and 0 are called binary signals collectively and high and low  
120 signals separately. If 1 and 0 stand for the Boolean truth values TRUE and FALSE,  
121 neurons can process information contained in binary signals by functioning as logic  
122 operators.

123 The strength of a signal consisting of action potentials, or spikes, can be  
124 measured by spike frequency. A high signal consists of a burst of spikes at the  
125 maximum spiking rate. For a signal that oscillates between high and low, the  
126 frequency of the oscillation is the frequency of bursts, not the frequency of spikes.

127 For binary signals, the response of a neuron with one excitatory and one  
128 inhibitory input is assumed to be as shown in Table 1. Of the 16 possible binary  
129 functions of two variables, this table represents the only one that is consistent with the  
130 customary meanings of "excitation" and "inhibition." Table 1 is also a logic truth table,  
131 with the last column representing the truth values of the statement X AND NOT Y. In  
132 simplest terms, the neuron performs this logic function because it is active when it has  
133 excitatory input *and* does *not* have inhibitory input.

134 The AND-NOT gate is virtually never used as a building block in logic circuit  
135 design. Its significance for the networks presented here is that it can be implemented  
136 with a single neuron. It was shown in [2, 4] that the AND-NOT gate, with access to  
137 high input, is functionally complete, meaning any logic function can be performed by a  
138 network of such components.

139

| Excitatory X | Inhibitory Y | Response |
|--------------|--------------|----------|
| 0            | 0            | 0        |
| 0            | 1            | 0        |
| 1            | 0            | 1        |
| 1            | 1            | 0        |

140 **Table 1. Neuron response to two binary inputs, one excitatory and one inhibitory.**

141 The response is the logical truth value of X AND NOT Y.

142 Some neurons are active spontaneously and continuously without excitatory  
143 input [6,7]. In the figures, neurons with no excitatory input are spontaneously active.  
144 The behavior of a spontaneously active neuron is assumed to be the same as a neuron  
145 with a high excitatory input.

### 146 **2.1.2. Single neuron logic primitives**

147 Fig 1 shows symbols for a few logic primitives. For several reasons that were  
148 detailed in [4], networks are illustrated with standard (ANSI/IEEE) logic symbols  
149 rather than symbols commonly used in neuroscience schematic diagrams. One of the  
150 reasons is that the symbols can be interpreted in two ways. As a logic symbol, the  
151 rectangle with one rounded side in Fig 1A represents the AND logic function, and the  
152 circle represents negation. The input variables X and Y represent truth values TRUE or  
153 FALSE, and the output represents the truth value X AND NOT Y. Second, Fig 1A can  
154 also represent a single neuron, with a circle representing inhibitory input and no circle



155 representing excitatory input. If  $X$  and  $Y$  are binary inputs, the output is  $X$  AND NOT  
 156  $Y$  by Table 1. For the rest of the symbols in Fig 1 and the networks in subsequent  
 157 figures, the outputs follow from straightforward Boolean logic.

158

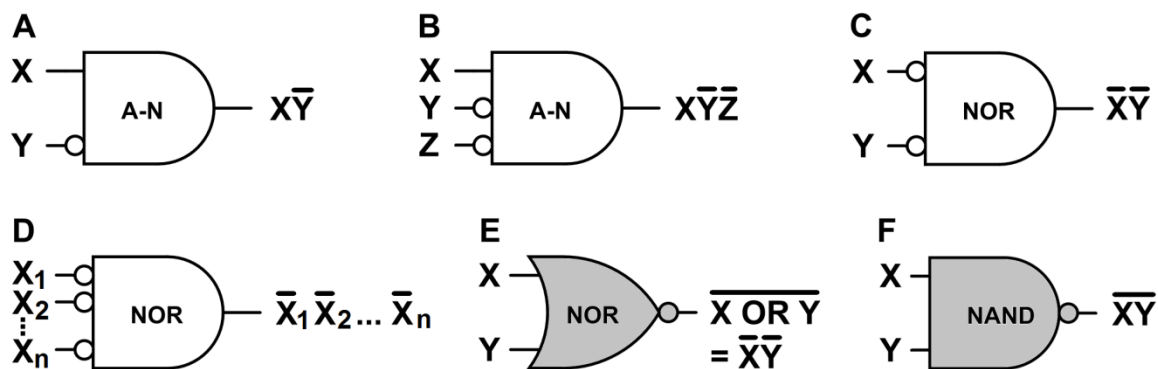

160 **Fig 1. Logic primitives: AND-NOT, NOR, NAND.** Each white diagram can be  
 161 implemented with a single neuron or with electronic components. The gray symbols  
 162 are commonly used in electronic logic circuit design. **A.** A logic symbol for an AND-  
 163 NOT gate, or a neuron with one excitatory input and one inhibitory input. **B.** A three-  
 164 input AND-NOT gate, or a neuron with one excitatory input and two inhibitory inputs.  
 165 **C.** The NOR function implemented with an AND gate or with a spontaneously active  
 166 neuron and two inhibitory inputs. **D.** A multi-input NOR gate (short for "NOT OR"),  
 167 or a spontaneously active neuron with several inhibitory inputs. **E.** The most common  
 168 symbol for a NOR gate. **F.** The most common symbol for a NAND gate (for "NOT  
 169 AND").

170 The neuron logic for Fig 1B follows from Table 1: if one inhibitory input can  
 171 suppress one excitatory input, then either one of two inhibitory inputs can suppress the  
 172 excitatory input. The neuron output for Fig 1C follows from Fig 1B and the property  
 173 that the behavior of a spontaneously active neuron is the same as a neuron with high  
 174 excitatory input.

175 The logic primitive NOT(X OR Y) is called the NOR operator (for "NOT OR").  
176 By De Morgan's law, NOT(X OR Y) is logically equivalent to (NOT X) AND (NOT  
177 Y). The latter is the output of Fig 1C. In simplest terms, this neuron is a NOR gate  
178 because it is active when it has inhibitory input from neither X *nor* Y. Like the AND-  
179 NOT operator, the NOR operator is functionally complete. This operator will be used  
180 extensively in the figures and simulations, so its response function is shown in Table 2.  
181

| Inhibitory X | Inhibitory Y | Response |
|--------------|--------------|----------|
| 0            | 0            | 1        |
| 0            | 1            | 0        |
| 1            | 0            | 0        |
| 1            | 1            | 0        |

182 **Table 2. A spontaneously active neuron's NOR response to binary, inhibitory**  
183 **inputs (Fig 1C).** The response (NOT X) AND (NOT Y) is logically equivalent to  
184 NOT(X OR Y) by de Morgan's law.

185 Fig 1D generalizes Fig 1C: Any of several inhibitory inputs can suppress a  
186 spontaneously active neuron. This general NOR gate is an efficient and powerful  
187 mechanism. It was shown in [2] that a neuron with a continuously high excitatory  
188 input and an inhibitory input X functions as a NOT gate (output NOT X), also known  
189 as an inverter. Negating the output of Fig 1D with an inverter makes the two-neuron  
190 network a general OR gate (output  $X_1$  OR  $X_2$  OR ... OR  $X_n$ ) by De Morgan's law.  
191 Negating some or all of the inputs to Fig 1D with inverters makes the NOR gate a  
192 general AND gate. This means any conjunction of n inputs or their negations can be  
193 implemented with at most n + 1 neurons and as few as 1, depending on how many of  
194 the inputs need to be negated. A well-known theorem of logic says that any logic  
195 statement can be expressed either as a sum (OR) of products (AND) or as a product of

196 sums. This implies that complex logic can be implemented with a few neurons and  
197 many synapses.

198 Fig 1E is the most commonly used symbol for a NOR gate. The logic  
199 operations performed by Figs 1C and 1E are logically equivalent by de Morgan's law.  
200 The symbol in Fig 1C will be used to represent the NOR gate in the network diagrams  
201 here because it is more easily interpreted as a single neuron with the inhibitory inputs  
202 indicated explicitly, and because it is convenient for showing how some neural  
203 networks can be derived from standard electronic designs.

204 The logic primitive NOT(X AND Y) is called the NAND operator (for "NOT  
205 AND"). Fig 1F is the most commonly used symbol for a NAND gate. The NAND  
206 operator is functionally complete, and the NAND and NOR gates are two of the most  
207 commonly used logic gates in electronic logic circuit design. Here the NAND gate will  
208 be used only in demonstrating the derivation of the neural CPGs from electronic  
209 circuits.

### 210 **2.1.3. Flip-flops and oscillators**

211 An oscillator is the basic element of a timing mechanism. It produces periodic  
212 bursts of a high signal followed a quiescent interval of a low signal.

213 A flip-flop is a memory mechanism that stores one bit of information in an  
214 output that is either 0 or 1. This output is the flip-flop *state* or *memory bit*. A change  
215 in the state *inverts* the state. The information is stored by means of a brief input signal  
216 that determines the output. A distinction is sometimes made between a "flip-flop" and  
217 a "latch," with the latter term reserved for asynchronous memory mechanisms that are  
218 not controlled by an oscillator. The more familiar "flip-flop" will be used here for all  
219 cases.

220 A toggle is a flip-flop with one input that inverts the flip-flop's memory state  
221 each time the input is high. With input from an oscillator, a toggle functions as another  
222 oscillator. Because two high inputs are required for each cycle, a toggle-as-oscillator  
223 produces a signal whose frequency is exactly half that of the toggle's input.

### 224 2.1.3.1. Neural and electronic flip-flops and oscillators

225 Fig 2 shows several examples of flip-flops and oscillators. The flip-flops'  
226 memory bit is labeled M in the diagrams. Input S sets the state to  $M = 1$ , and R resets  
227 it to  $M = 0$ . Feedback maintains a stable state. Configured as a toggle, the single input  
228 is labeled T.

229

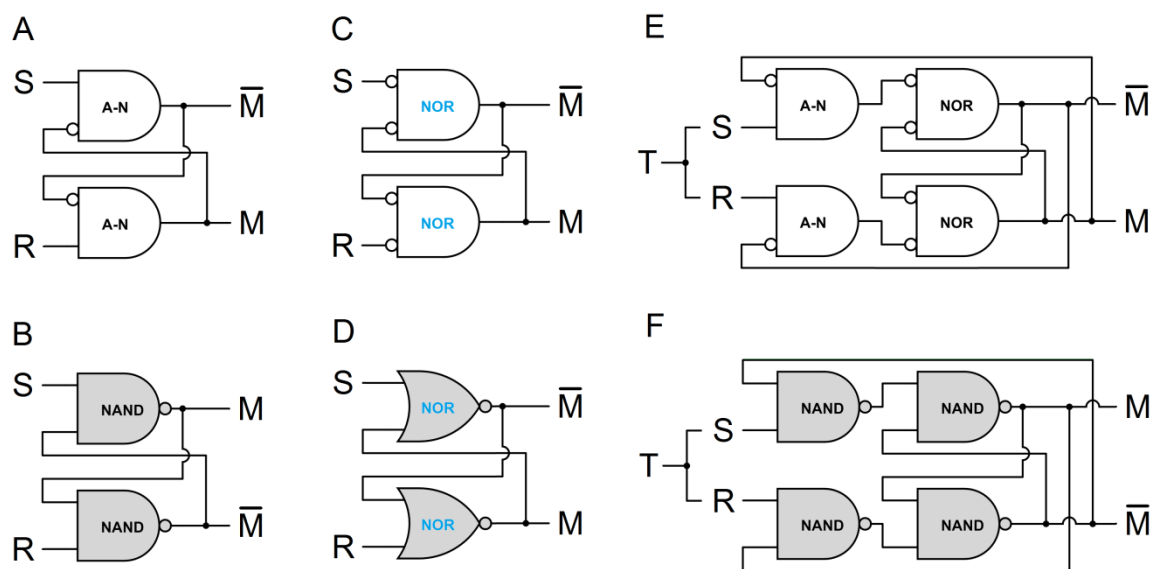

230

231 **Fig 2. Neural and electronic flip-flops and oscillators.** Each white network  
232 performs the same logic function as the gray network below it. The white networks are  
233 composed of logic gates from Fig 1 that can be implemented with neurons or with  
234 electronic components. The gray diagrams are widely known logic circuits and are  
235 composed of logic gates commonly used in electronic logic circuits. **A, B.** Active low

236 set-reset flip-flops. **C, D.** Active high set-reset flip-flop composed of NOR gates.

237 **E, F.** JK flip-flops or toggles.

238 Figs 2C and 2D show identical networks, illustrated with logically equivalent  
239 component symbols (Figs 1C and 1E). Each network in each of the other two pairs can  
240 be derived from the other network simply by moving each negation circle from one end  
241 of a connection to the other. If a circle is moved past a branch point to an output, the  
242 output is inverted. Moving the negation circles does not change the logic of the  
243 network, but it means each logic gate in the white networks can be implemented with a  
244 single neuron from Fig 1. Although this is a minor modification, the white networks  
245 that contain AND-NOT gates are likely new to engineering because the AND-NOT  
246 gate is virtually never used as a building block in logic circuit design.

247 Figs 2A and 2B show active low set-reset (SR) flip-flops. The S and R inputs  
248 are normally high. A brief low input S sets the memory M to 1, and a brief low input R  
249 resets it to 0. Negating the inputs of Fig 2A produces the active high SR flip-flop of  
250 Fig 2C. The S and R inputs are normally low. A brief high input S sets the memory M  
251 to 1, and a brief high input R resets it to 0. A problem with the SR flip-flops is that an  
252 error occurs if both S and R are low simultaneously for the active low flip-flops (Figs  
253 2A and 2B), or simultaneously high for the active high flip-flops (Figs 2C and 2D).

254 Figs 2E and 2F show JK flip-flops. The advantage of the JK flip-flop is that if  
255 S and R are both high simultaneously, the flip-flop state is inverted because one of the  
256 inputs is suppressed by one of the outputs. This means the JK flip-flop can be  
257 configured as a toggle by linking the Set and Reset inputs, as illustrated in the figures  
258 with the single input T. A JK flip-flop configured in this way functions as a toggle  
259 only for high inputs of short duration. If the duration is too long, the outputs will  
260 oscillate.

### 261 2.1.3.2. Flip-flop ring oscillators

262 An inverter is a logic operator that has a single input X and an output that is the  
263 opposite of X, i.e., NOT X. An odd number of three or more inverters connected  
264 sequentially in a ring produces periodic bursts as each gate inverts the next one. The  
265 odd number of inverters makes all of the inverter states unstable, so the states oscillate  
266 between high and low.

267 The flip-flop ring oscillator is a generalization of the inverter ring oscillator. It  
268 is composed of two or more simple flip-flops, with both outputs of each flip-flop  
269 connected as inputs to the next one. Fig 3 shows four flip-flop ring oscillators.  
270

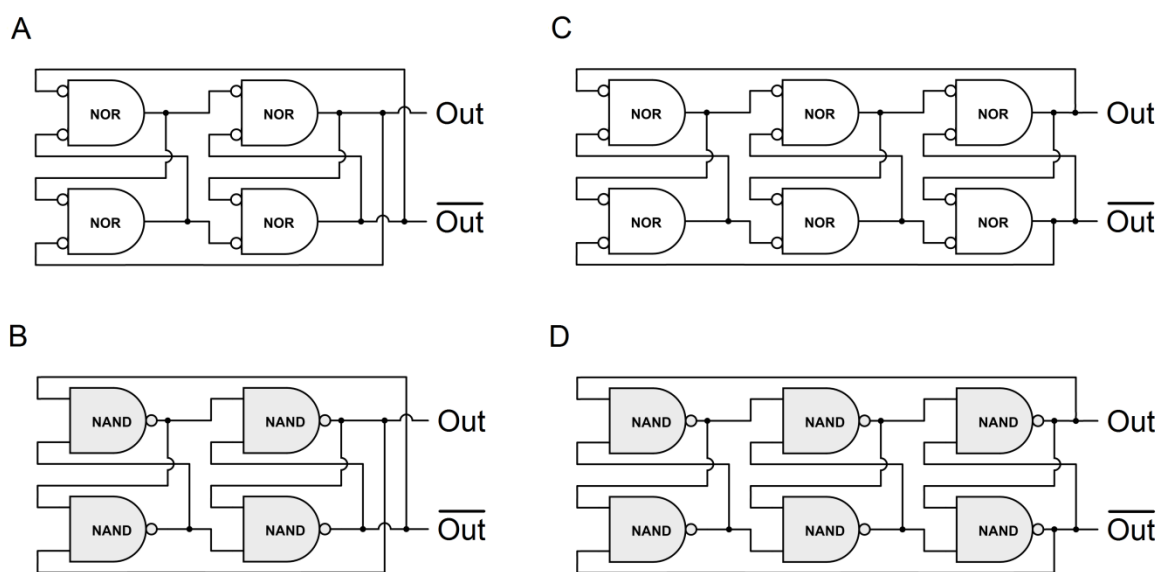

271

272 **Fig 3. Flip-flop ring oscillators.** The white and gray networks are composed of flip-  
273 fops from Figs 2C and 2B, respectively.

274 As in Fig 2, each white network in Fig 3 performs the same function as the gray  
275 network below it. Each network in each pair can be derived from the other by moving  
276 the negation circles from one end of a connection to the other. All of the gates (NOR  
277 and NAND) are commonly used in electronic logic circuits, but the NOR gate can be

278 implemented by a neuron and is therefore white and represented by Fig 1C. The gray  
279 networks are light gray because they are composed of NAND gates that are common in  
280 electronic logic circuits, but unlike the gray networks in Fig 2, the flip-flop ring  
281 oscillator is apparently a new concept.

282 A flip-flop ring can have any number of flip-flops greater than one, but they  
283 must be connected differently depending on whether the number is even or odd. If  
284 each gate has input to the next gate ahead, as shown in Fig 3, but with no connection  
285 between the first and last flip-flop, all states are stable with alternating states  
286 horizontally and vertically. The first and last gates in each row have opposite states if  
287 the number of flip-flops is even and same states if the number is odd. The states are  
288 made unstable, as shown in Fig 3, by connecting opposite rows if the number of flip-  
289 flops is even and connecting to the same row if the number is odd. That is, the even  
290 number of flip-flops is connected like a Möbius strip, and the odd number like a ring.

## 291 **2.2. Stomatogastric nervous system**

### 292 **2.2.1. Schematic of the stomatogastric nervous system**

293 A diagram of the stomatogastric nervous system is shown in Fig 4A, with  
294 simplified diagrams of the two CPGs in Figs 4B and 4C. Small triangles indicate  
295 excitatory synapses, and small circles indicate inhibitory synapses. Prominent features  
296 include mostly inhibitory synapses and pairs of cells with reciprocal, inhibitory input.  
297 Fig 4B shows three such pairs and Fig 4C has four. Several of the large circles in Figs  
298 4B and 4C represent more than one cell, so most of the pairs represent multiple pairs in  
299 Fig 4A. Some of the cells have reciprocal, inhibitory inputs with more than one other  
300 cell.

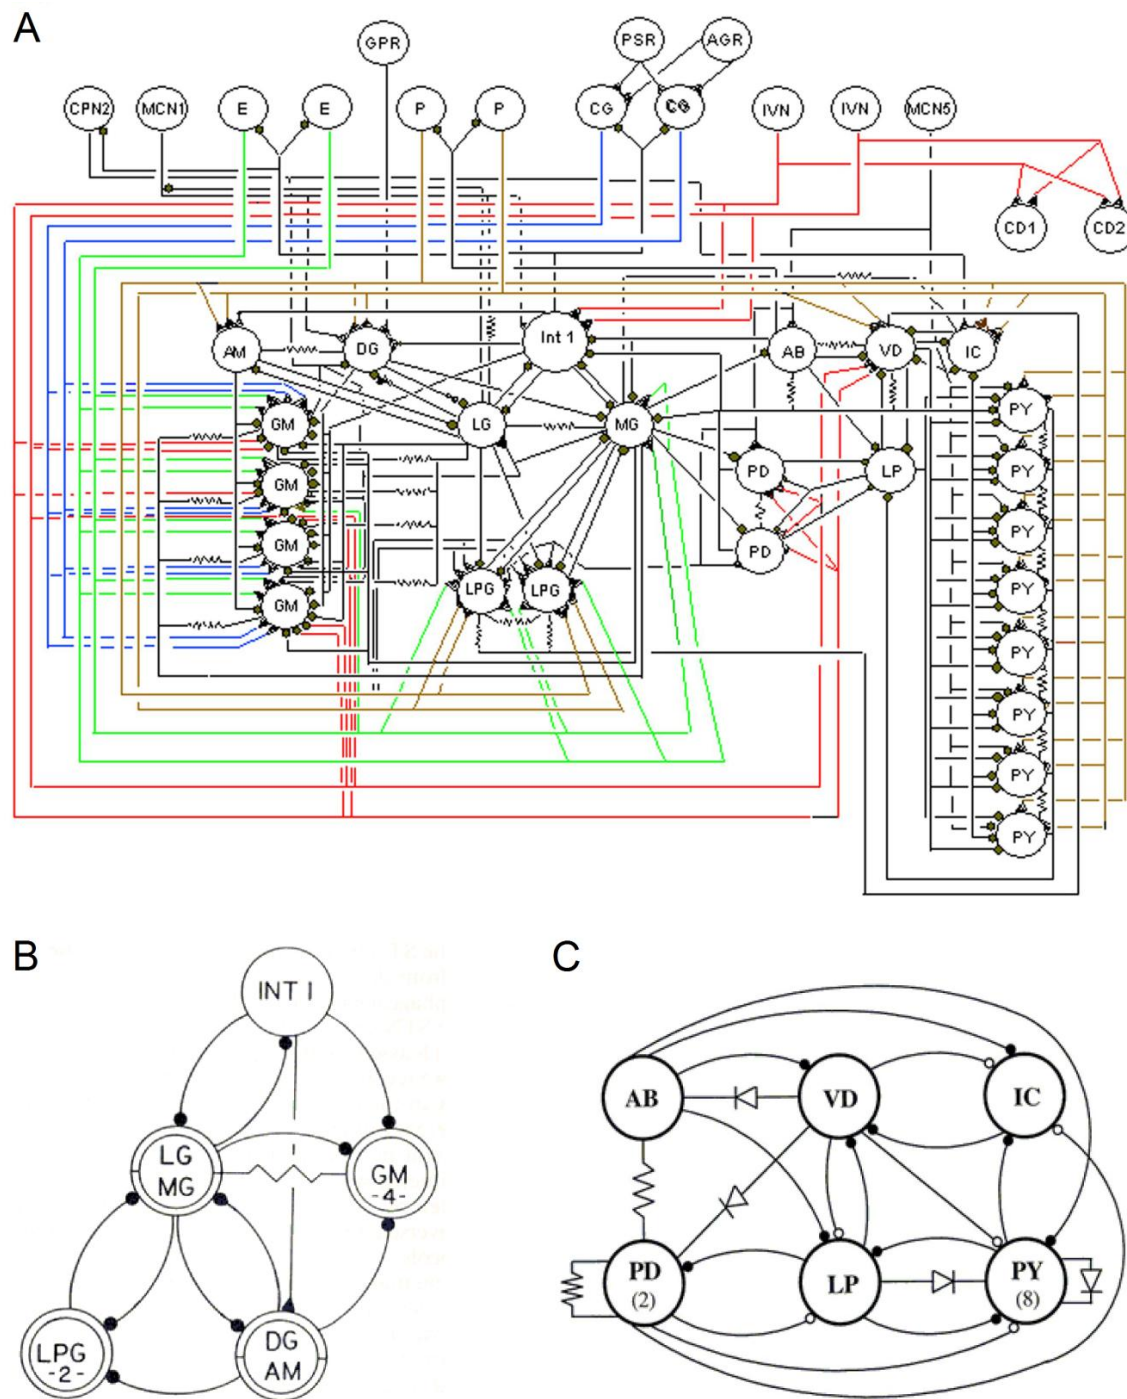

301

302 **Fig 4. Stomatogastric nervous system.** Triangles indicate excitatory synapses.

303 Closed circles represent glutamatergic inhibitory synapses and open circles cholinergic

304 inhibitory synapses. Resistors indicate electrical connections and diodes are rectifying

305 connections. **A.** The stomatogastric nervous system. The gastric CPG is on the left and



306 the pyloric CPG is on the right. At the top are excitatory neurons, brain cells, and  
307 sensory receptor cells. **B.** Simplified version of the gastric CPG. **C.** Simplified version  
308 of the pyloric CPG. (Diagrams courtesy of Allen Selverston [8].)  
309

### 310 2.2.2. Pyloric oscillations

311 Table 3 gives a brief description of the neurons of the pyloric CPG.

**Pyloric Neurons**

| # of copies | Name                | Abbr. | Muscle            | Transmitter |
|-------------|---------------------|-------|-------------------|-------------|
| 1           | anterior burster    | (AB)  | interneuron       | glu         |
| 2           | pyloric dilator     | (PD)  | cpv 1&2           | ach         |
| 1           | lateral pyloric     | (LP)  | p1                | glu         |
| 1           | ventricular dilator | (VD)  | cv 2              | ach         |
| 1           | inferior cardiac    | (IC)  | cv 3              | glu         |
| 8           | pyloric             | (PY)  | p 2-4, 7-8, 10-11 | glu         |

312

313 **Table 3. Pyloric neurons.** (Table courtesy of Allen Selverston [8].)

314 Fig 5 shows the results of 17 recordings of pyloric neuron bursts in American  
315 lobsters (*H. americanus*) [9]. (See Fig 4C.) As the authors point out, the bursts appear  
316 to have four distinct phases: 1) PD, 2) IC, 3) LP, and 4) VD, PY, and AM. The AM  
317 bars are light gray because that neuron was bursting in only 7 of the recordings.  
318

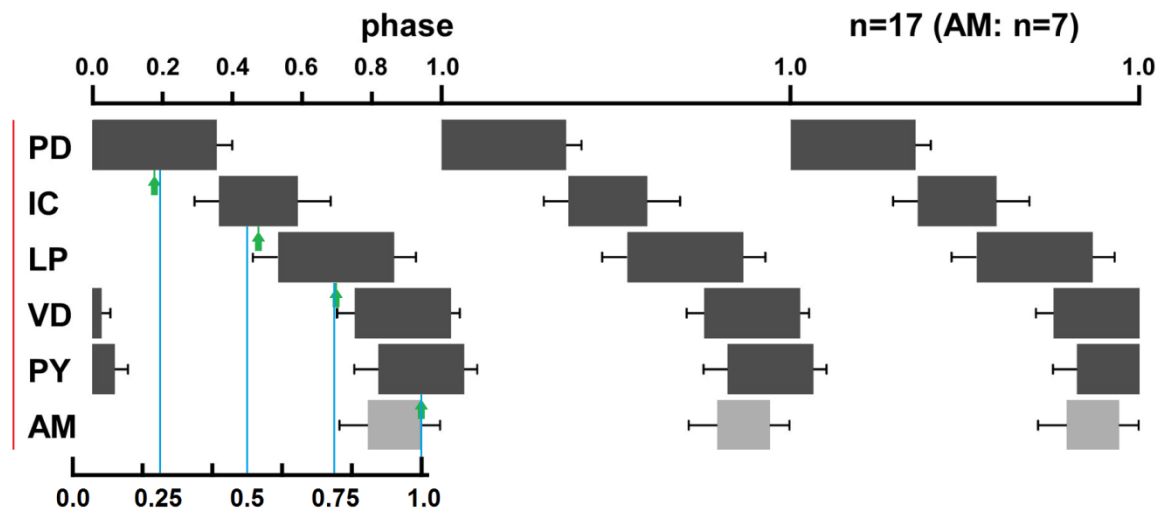

319

320 **Fig 5. Pyloric phase and burst relationships.** Three cycles of pyloric CPG bursts are  
321 shown. Error bars indicate standard deviations. (Adapted from [9].)

322 The colored parts and the copy of the period bar at the bottom of the figure were  
323 added to the original figure. The red line is used to align these graphs with the  
324 simulation graphs. The blue lines are uniformly distributed over the period (from pixel  
325 counts in the original image). The green arrows indicate the centers of four of the  
326 bursts (again from pixel counts). The arrows and blue lines show the burst centers are  
327 close to a uniform distribution over the period, especially considering the small sample  
328 size (17 recordings) and the magnitudes of the standard deviation bars.

329 The observation above - that the phases of four of the American lobster's  
330 pyloric oscillations, as determined by the burst centers, are approximately uniformly  
331 distributed over the period - is apparently new. It will be seen in the simulations that  
332 different CPGs can produce oscillations with phases uniformly distributed at the burst  
333 centers, at the burst onsets, or both.

334 Table 4 shows the approximate burst durations of the oscillations in Fig 5 as a  
335 proportion of the period (from pixel counts in the original image).

336

| Neuron | Burst duration |
|--------|----------------|
| PD     | 0.36           |
| IC     | 0.22           |
| LP     | 0.33           |
| VD     | 0.27           |
| PY     | 0.25           |
| AM     | 0.15           |

337 **Table 4. Pyloric burst durations in Fig 5.**

### 338 **2.3. Comparing pyloric oscillations to simulations of model CPGs**

#### 339 **2.3.1. Classifying pyloric cells and comparisons with different models**

340 The pyloric neurons considered here were chosen because they appear in Fig 5  
341 and in both Tables 3 and 4, i.e., PD, LP, VD, IC, and PY. Categorizing a neuron as  
342 gastric or pyloric is complicated by the several connections between the two CPGs.  
343 Some neurons can fire with either gastric or pyloric rhythm, depending on  
344 neuromodulatory or sensory input [10-14]. Some neurons vary by species. The AM  
345 neuron, for example, fires mostly in gastric time in *C. borealis* and *P. interruptus* [12,  
346 15]. It is either silent or fires in pyloric time in *H. Americanus* [9], and it fires in  
347 pyloric time in *H. gammarus* [16].

348 How well the model CPGs match the pyloric oscillations depends on the  
349 model's oscillations' burst durations and how the phases are distributed over the period.  
350 The pyloric neurons considered here produce short and long burst durations, averaging  
351 approximately 0.25 of the period for the IC, VD, PY cells and 0.35 for the LP and two  
352 PD cells (Table 4). The burst centers are approximately uniformly distributed over the  
353 period, as shown in Fig 5. Model CPGs based on the JK toggle produce oscillations  
354 that have burst durations of  $1/4$  and  $3/8$  ( $\approx 0.37$ ) of the period, closely matching the  
355 pyloric burst durations. However, the burst onsets, not the centers, are uniformly

356 distributed over the period. Consequently, the JK oscillators' burst durations are a  
357 somewhat better match with the pyloric oscillations than the phases. Model CPGs  
358 based on flip-flop rings produce burst durations of 3/8 of the period, closely matching  
359 the pyloric LP and PD cells. Both the burst centers and burst onsets are uniformly  
360 distributed over the period. Consequently, the flip-flop rings' phases match the pyloric  
361 somewhat better than the burst durations.

### 362 **2.3.2. Simulation and comparison methods**

363 Since the model CPGs are illustrated with standard logic symbols, they can be  
364 constructed with ordinary electronic components or simulated with electronic circuit  
365 software. Two model CPGs were simulated in CircuitLab.

366 The CPG models that contain AND-NOT gates were simulated only in MS  
367 Excel. Since the AND-NOT gate is virtually never used in electronic circuit design, it  
368 normally is not found in simulation software. An AND-NOT gate could be composed  
369 of an AND gate and a NOT gate, but that would be simulated with two gate delay  
370 times. The electronic simulations are only for illustration. Because the neuron  
371 responses are the same as Boolean logic gates (Tables 1 and 2), all of the electronic  
372 implementations should match the neural implementations.

373 For the Excel simulations, the number  $t_i$  represents the time after  $i$  neuron delay  
374 times. The neurons' outputs were initialized at time  $t_0 = 0$  as given in the text. For  
375  $i > 0$ , the output of each neuron at time  $t_i$  was computed as a function of the inputs at  
376 time  $t_{i-1}$  according to Tables 1 and 2.

377 The model CPGs' periods depend on the delay times of the component neurons.  
378 The delay times required for model CPGs to match the pyloric period were computed  
379 for each model. For comparing oscillations, the simulation graphs of each model

380 CPG's oscillations were stacked in a single image (as in Fig 5). The size of this image  
381 was adjusted to match the simulation period with the STG period in Fig 5. Because the  
382 centers of the pyloric bursts are distributed approximately uniformly over the period,  
383 the center of a burst bar of one of the pyloric oscillations from Fig 5 was aligned with  
384 the center of a burst of one of the simulated oscillations. The other pyloric oscillations  
385 of Fig 5 were then aligned vertically with the closest fits in the stack of simulated  
386 oscillations and horizontally with the red vertical line in Fig 5.

### 387 **3. Results and Discussion**

#### 388 **3.1. Simulation results**

##### 389 **3.1.1. Flip-flop ring oscillator**

###### 390 **3.1.1.1. The flip-flop ring oscillator implemented with neurons**

391 Fig 6 shows a comparison of a flip-flop ring oscillator and the pyloric CPG's  
392 four distinct phases.  
393

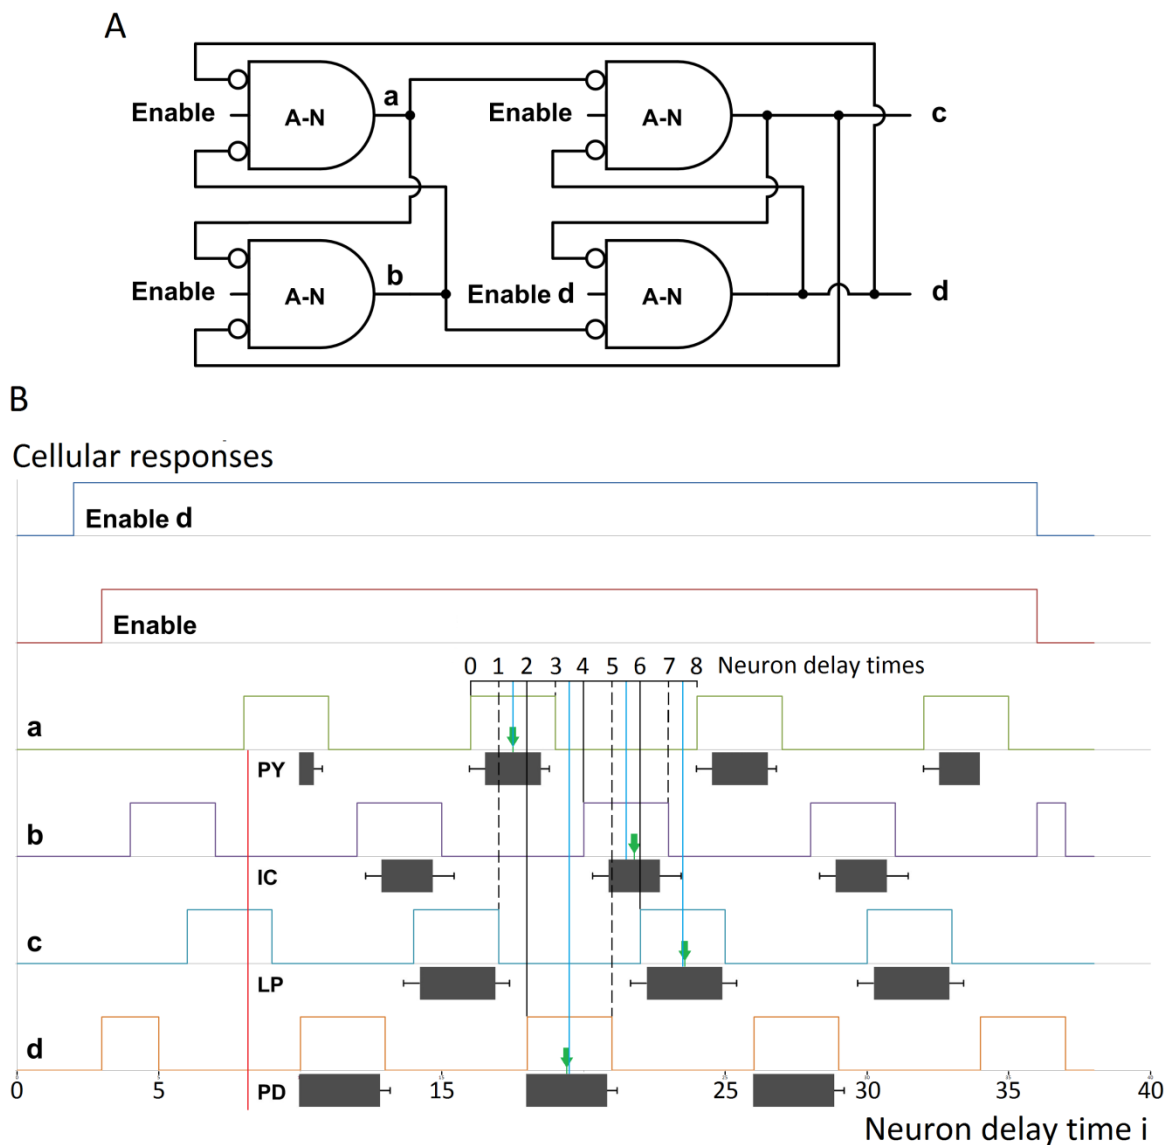

394

395 **Fig 6. Neuron implementation of the flip-flop ring oscillator.** **A.** The flip-flop ring  
 396 oscillator of Fig 3A with excitatory enabling inputs from the brain or sensory cells. **B.**  
 397 A comparison of a simulation of the flip-flop ring oscillator with four of the oscillations  
 398 in Fig 5 that represent the pyloric CPG's four distinct phases. The flip-flop ring's four  
 399 oscillations have the same period, eight neuron delay times. Their phases are  
 400 uniformly distributed over the period at both the burst onsets, indicated by black lines,  
 401 and at the burst centers, indicated by blue lines. The black lines and dashed lines  
 402 together show that at each delay time, one of the four gates changes states. As in Fig 5,

403 the green arrows indicate the centers of the pyloric bursts, and the close fit with the  
404 blue lines shows that the oscillator and pyloric phases, as determined by the burst  
405 centers, are approximately the same.

406 The flip-flop ring in Fig 6A is composed of AND-NOT gates from fig 1B  
407 instead of NOR gates of Fig 1C so the cells can be enabled by excitatory input as  
408 needed. When enabled, the AND-NOT gates function the same as NOR gates. The  
409 enabling input could be from the brain or sensory receptor cells, as described in the  
410 caption for Fig 4A. Fig 4A shows that nearly all STG cells have at least one excitatory  
411 input.

412 Fig 6B shows that a slightly different enabling input to cell d initializes its high  
413 output first to give the flip-flop ring an asymmetry for initialization. In the STG,  
414 neuromodulatory inputs are necessary to initiate the oscillation [8]. For the electronic  
415 simulation in the next section, the software initializes the states.

416 The flip-flop ring's burst durations are three delay times, or  $3/8$  of the period.  
417 Table 4 shows the LP and PD burst durations of 0.33 and 0.36 are close to the flip-flop  
418 ring's  $3/8 \approx 0.37$ . Only the IC, PY, and VD bursts (0.22, 0.25, 0.27) are substantially  
419 shorter than the flip-flop ring's 0.37, although Fig 6B shows the flip-flop ring's burst  
420 durations are close to the extents of the pyloric IC and PY standard deviation bars. The  
421 pyloric period is  $1.35 \pm 0.18$  seconds [9]. For the flip-flop ring's eight neuron delay  
422 times per cycle, matching the pyloric period would mean an average neuron delay time  
423 of about 170 ms.

424 The alternative flip-flop ring composed of NAND gates (Fig 3B) has two  
425 problems with respect to modeling the STG. It is not clear that a single neuron can  
426 function as a Boolean NAND gate. That would require a neuron that is active when  
427 either of two inhibitory inputs is low, rather than both. Second, the NAND ring

428 oscillator gives the same uniformly distributed phases as the ring with NOR gates, but  
429 the pulse and quiescent durations are reversed, i.e., long pulses (5/8) and short  
430 quiescent intervals (3/8). These durations are quite far from the pyloric. Both of these  
431 problems are consistent with the hypothesis that the STG network architecture is  
432 similar to the NOR flip-flop ring of Fig 3A.

### 433 3.1.1.2. The flip-flop ring oscillator implemented with electronic components

434 To verify the operation of the flip-flop ring oscillator, Fig 7 shows the same  
435 comparison as Fig 6, with a CircuitLab simulation of an electronic implementation of  
436 the flip-flop ring of Fig 3A instead of the neural implementation. The result in Fig 7B  
437 is virtually identical to Fig 6B.

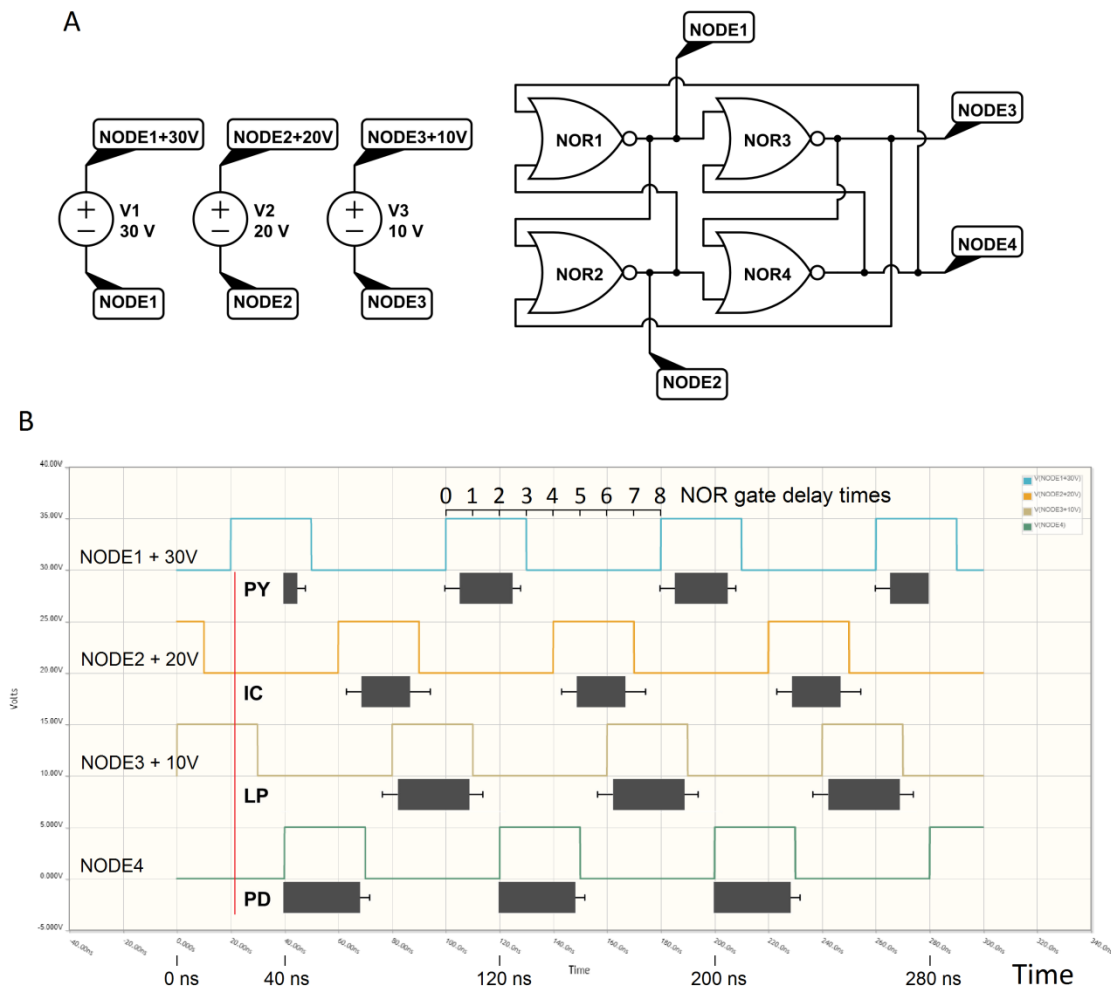



439 **Fig 7. Electronic implementation of the flip-flop ring oscillator. A.** Flip-flop ring  
440 of Fig 3A (with NOR gate symbols of Fig 1E). **B.** CircuitLab simulation of the flip-  
441 flop ring with the pyloric oscillations of Fig 5.

### 442 **3.1.1.3. An extension of the flip-flop ring oscillator**

443 An extension of the flip-flop ring oscillator can model six of the pyloric  
444 neurons, including the second PD neuron and VD. This extended ring oscillator also  
445 shows that a NOR gate (neural or electronic) can have reciprocal, inhibitory inputs with  
446 more than one other gate. Fig 4 shows the STG has several such neurons (e.g., the  
447 pyloric LP and VD). Although pairs of NOR or NAND gates with reciprocal,  
448 inhibitory inputs are quite common in electronic logic circuits, electronic gates  
449 apparently do not have reciprocal, inhibitory inputs with more than one other gate.

450 Figs 8A and 8B show an extension of the flip-flop ring oscillator in Fig 3A.  
451 The two networks are composed of logically equivalent NOR gates from Figs 1C and  
452 1E, respectively. The general NOR gate in Fig 1D with three inputs is also used. Since  
453 the networks in Figs 8A and 8B are logically equivalent, for convenience an electronic  
454 simulation of Fig 8B is shown in Fig 8C.  
455

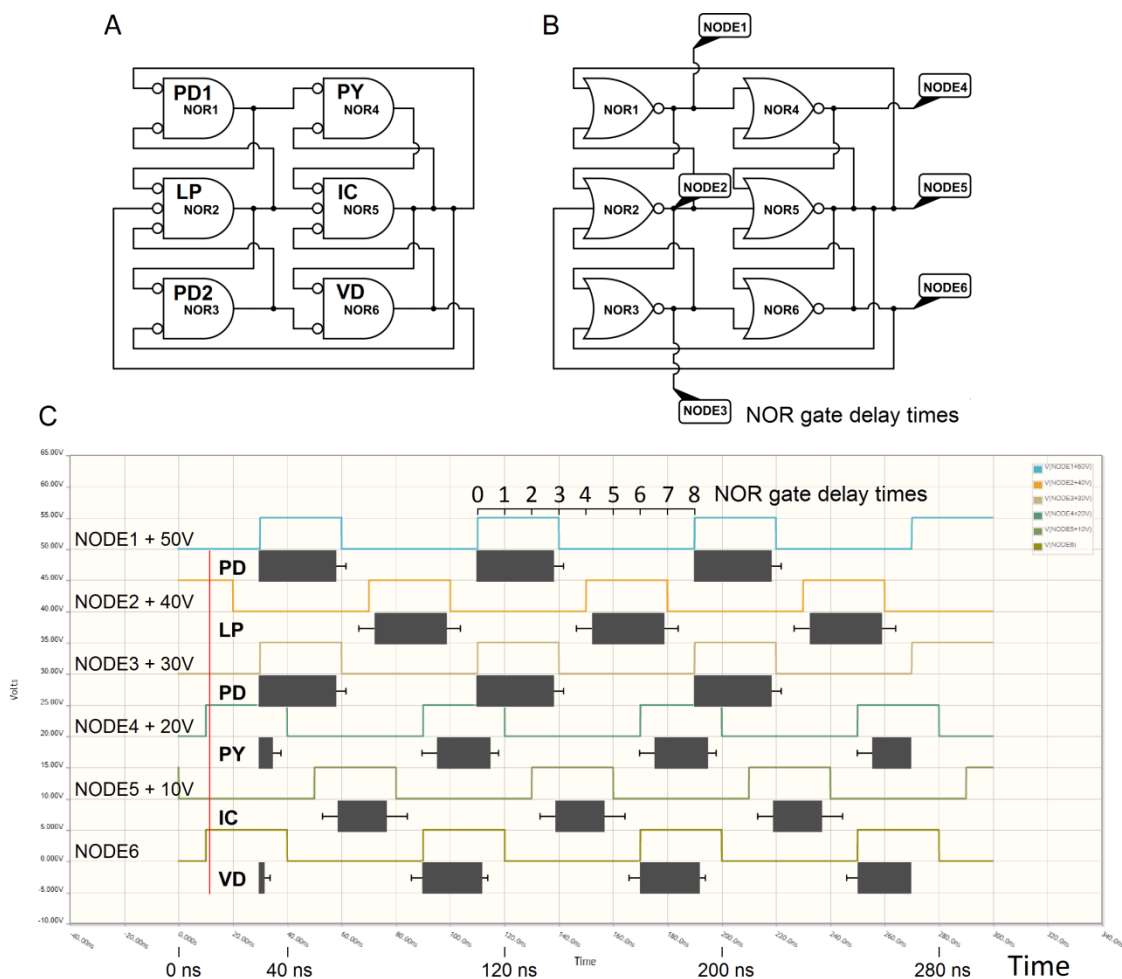

456

457 **Fig 8. An extended flip-flop ring oscillator.** This extension of the flip-flop ring  
 458 oscillator of Fig 3A models six of the pyloric neurons, including the second PD neuron  
 459 and VD. It also demonstrates that gates can have reciprocal, inhibitory inputs with  
 460 more than one other gate. **A.** An extension of the flip-flop ring oscillator. **B.** The same  
 461 network as in Fig A, illustrated with the most commonly use NOR gate symbol (Fig  
 462 1E). **C.** A CircuitLab simulation of the model CPG in Fig B. Like the flip-flop ring  
 463 simulations in Figs 6 and 7, the phases are uniformly distributed at the burst centers,  
 464 and the burst durations are 3/8 of the period.

465 The CircuitLab software assumes a 10 nanoseconds delay for each gate. The  
 466 simulations in Figs 7B and 8C show that the flip-flop ring oscillations have a period of

467 80 ns. The pyloric oscillations of the American lobster have a period of  $1.35 \pm 0.18$  sec  
468 [9]. So the electronic and lobster frequencies differ by a factor of about 17 million.

### 469 **3.1.2. JK toggle**

#### 470 **3.1.2.1. Two configurations of the JK toggle as oscillators**

471 Fig 9A shows the JK NFF of Fig 2E configured as a toggle. The simulations in  
472 Figs 9B and 9C show the toggle's output with an oscillating input and with a  
473 continuously high input.

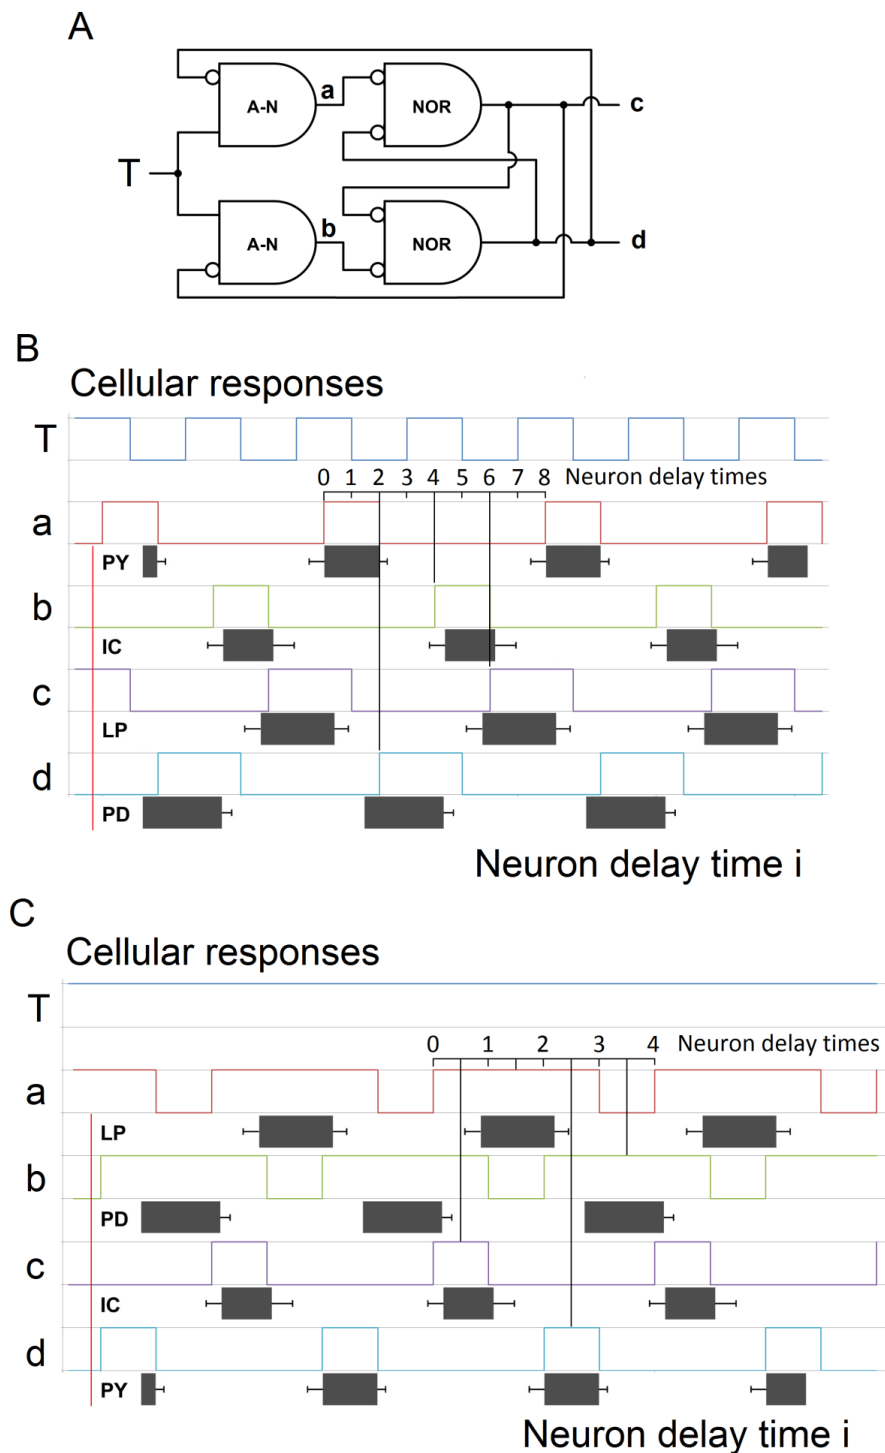

474

475 **Fig 9. JK toggle configured as an oscillator. A.** The JK toggle of Fig 2E. **B.**

476 Simulation of the toggle with input from an oscillator. **C.** Simulation of the toggle

477 with continuously high input.

478 Fig 9B shows the simulated JK toggle with an oscillating input, possibly from  
479 an intrinsically bursting neuron or pacemaker neuron. The simulation shows two  
480 oscillations with burst durations of 0.25, nearly a perfect match with the pyloric PY and  
481 IC bursts of 0.25 and 0.23 (Table 4). This is also a close match with the pyloric VD  
482 burst of 0.27 (not shown in the simulation). The other two burst durations are  $3/8 \approx$   
483 0.37 like the flip-flop ring oscillator of Fig 6, a reasonably close match with the pyloric  
484 LP and PD bursts of 0.33 and 0.36. However, the JK toggle's phases are uniformly  
485 distributed at the burst onsets, as indicated by the black lines, not at the burst centers.  
486 So the phases do not match the pyloric CPG quite as well as the flip-flop ring oscillator  
487 of Fig 6.

488 Like the flip-flop ring (Figs 6-8), the JK toggle's period is eight neuron delay  
489 times. So to match the pyloric period of 1.35 sec, the average neuron delay time must  
490 be about 170 ms. Since the JK toggle is driven by an oscillating input, the CPG's  
491 period also depends on the period of the input. For a JK toggle with oscillating input to  
492 oscillate successfully, the burst duration of the input must be about two neuron delay  
493 times. For the JK toggle to have burst durations of  $1/4$  and  $3/8$  of the period, the  
494 quiescent interval of the input must also be two neuron delay times. That makes the  
495 period of the oscillating input about 0.68 sec, or a frequency of about 1.47 Hz.

496 Fig 9C shows a simulation of the JK toggle with a continuously high input.  
497 Like the toggle with oscillating input in Fig 9B, this network has two oscillations with  
498 burst durations of 0.25 that closely match the pyloric PY and IC bursts of 0.25 and  
499 0.23. The phases are uniformly distributed at the burst centers, indicated by the black  
500 vertical lines, so all of the phases also show a good fit. However, the JK toggle's other  
501 two burst durations are 0.75, substantially greater than the pyloric burst durations of  
502 0.33 and 0.36. The model CPG's period is the sum of four neuron delay times. For this  
503 period to match the pyloric period, the average neuron delay would be about 0.34 sec.

504           The pyloric PY was placed at the bottom to match the short burst of oscillation  
505   d. However, the order of the pyloric oscillations is not the reverse of the order in all of  
506   the previous simulations. The order is different because the order of the simulated  
507   oscillations is actually different, not simply reversed.

### 508   **3.1.2.2. An extension of the JK toggle**

509           Fig 10 shows that an extension of the JK toggle produces a close match with six  
510   of the pyloric oscillations. Like the extension of the flip-flop ring in Fig 8, a cell has  
511   reciprocal, inhibitory inputs with more than one cell. Also like the JK toggle, the  
512   extended version's oscillations are uniformly distributed by burst onsets, indicated by  
513   vertical lines, so not all of the phases match the pyloric phases closely.  
514

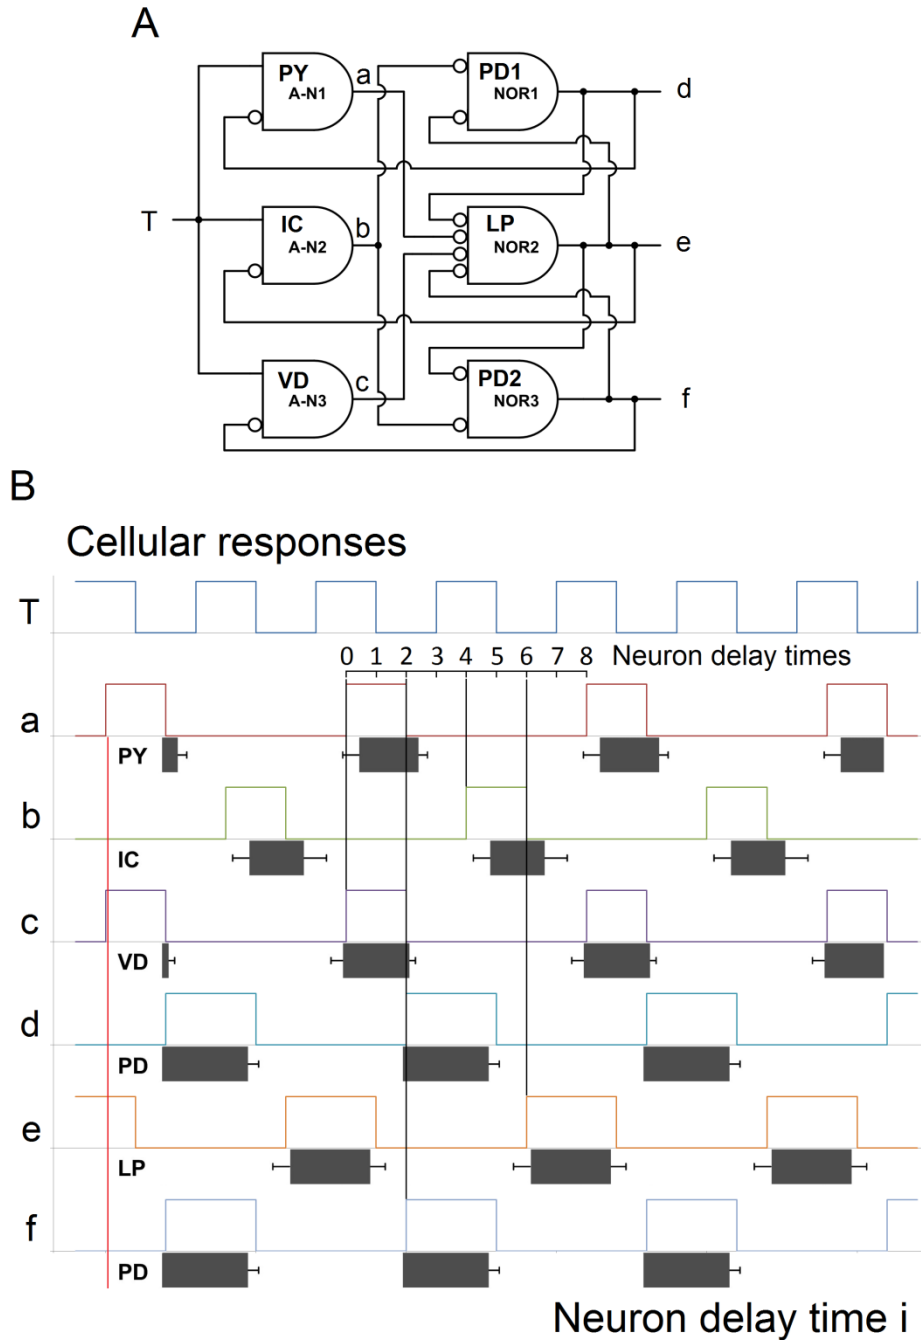

515

516 **Fig 10. An extended JK toggle.**

517 **3.1.2.3. The problem of modeling a mechanism with several attributes.**

518 Finally, Fig 11 illustrates the difficulty in designing a CPG that generates an  
519 arbitrary set of oscillations with various phases and burst durations. Fig 11A shows an

520 extension of the JK toggle in Fig 9A that is different from the extension in Fig 10A and

521 similar to the extension of the flip-flop ring in Fig 8A.

522

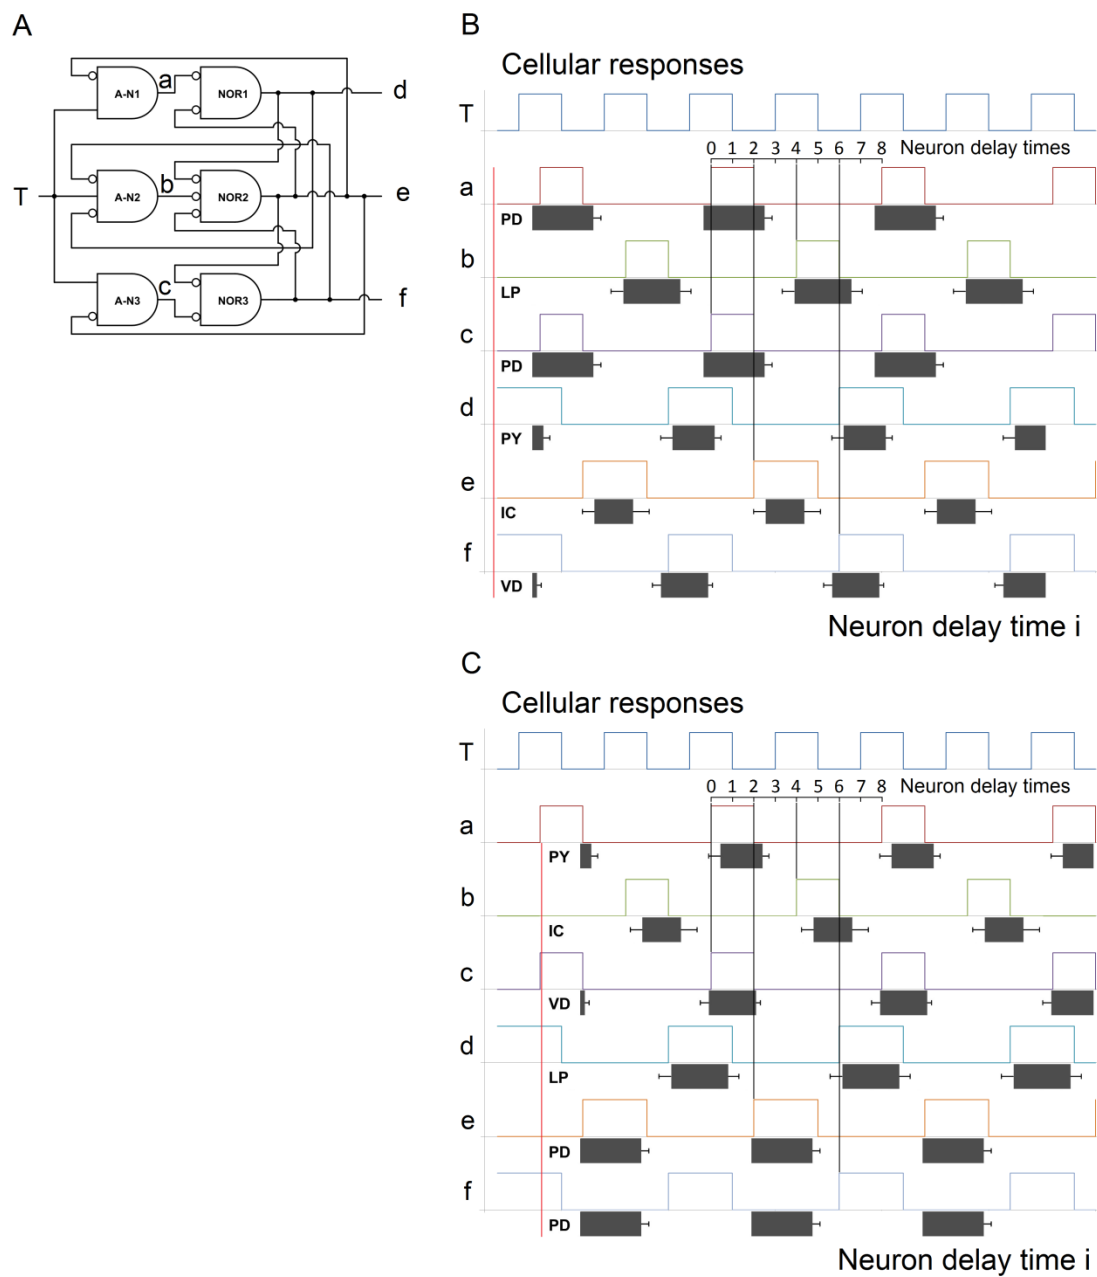

523



524 **Fig 11. A different extension of the JK toggle.** In spite of basic similarities between  
525 the oscillations of the model CPG and the pyloric CPG, they do not come close to  
526 matching.

527 The model CPG in Fig 11A has all of the similarities to the pyloric CPG that are  
528 listed in the abstract, and more: Like Fig 10B, the simulation in Figs 11B and 11C  
529 shows three oscillations with bursts of 1/4 of the period and three with bursts of 3/8. A  
530 matched pair of oscillations at each burst duration is 180 degrees out of phase with the  
531 third oscillation of that burst duration.

532 Yet the oscillations do not match even approximately. If the oscillations are  
533 aligned by the best fit of phases, as in Fig 11B, the burst durations are reversed. If the  
534 oscillations are aligned by the best fit of burst durations, as in Fig 11C, at least one pair  
535 of oscillations is out of phase by about 180 degrees.

## 536 **3.2. Predictions**

### 537 **3.2.1. Previous predictions supported by STGs**

538 Several STG phenomena support NFF predictions in a previous paper [4].  
539 There the NFF output  $M$  or  $\bar{M}$  was shown to produce seven known characteristics  
540 associated with short-term memory formation, retention, retrieval, termination, and  
541 errors. It was also shown that  $M$  and  $\bar{M}$  together predict eight unknown phenomena.  
542 STGs verify five of the predictions: The two output neurons were predicted to have 1)  
543 close proximity; 2) reciprocal, 3) inhibitory inputs; and 4) complementary outputs.  
544 When the neurons change states, 5) the neuron with high output changes first.  
545 Predictions 1-3 can be seen here in the NFFs in Fig 2, and predictions 4 and 5 can be  
546 seen in the outputs c and d in the two simulations of the JK NFF in Fig 9.

547 At least three pyloric neuron pairs satisfy these predictions: PD-LP (two pairs)  
548 and IC-VD (one pair). The STG consists of about 30 neurons, so the neurons are in  
549 close proximity. Figs 4A and 4C show each pair has reciprocal, inhibitory inputs. Fig  
550 5 shows each pair has complementary outputs, and that when each pair changes states,  
551 the neuron with high output changes first.

### 552 3.2.2. Testable predictions of constructed neural networks

553 Any of the networks in the figures could be constructed with actual neurons and  
554 tested for their predicted behavior. (Constructing and testing NFFs were also discussed  
555 in [4, 5].) Fig 12 shows a few simple possibilities.

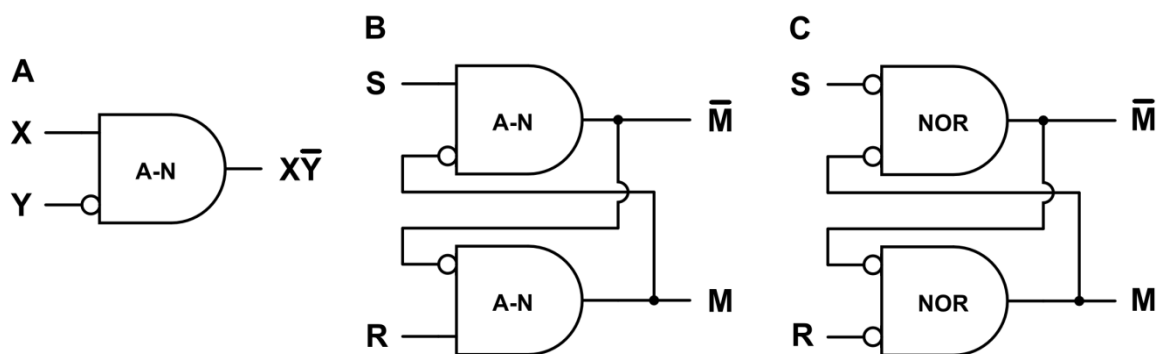

556

557 **Fig 12. Simple neural networks that can be constructed and tested for predicted**  
558 **behavior.** The networks are from Figs 1 and 2.

559 The predicted behavior Fig 12A is indicated by Table 1. For the NFFs in Figs  
560 12B and 12C, brief input from S sets M high and brief input from R resets M low.  
561 Recall the NFF in Fig 12B is active low, i.e., the inputs are normally high and brief low  
562 inputs from S and R invert the state. Fig 12C requires spontaneously active neurons.

563 **4. Acknowledgements**

564 Simulations were done in CircuitLab and Excel. Figures were created in  
565 CircuitLab and MS Paint. The author would like to thank Duncan Watson, Arturo  
566 Tozzi, Robert Barfield, David Garmire, Paul Higashi, Anna Yoder Higashi, Sheila  
567 Yoder, and especially Ernest Greene and David Burrell for their support and many  
568 helpful comments.

569 **5. References**

- 570 1. Yoder L. Relative absorption model of color vision. *Color Research &*  
571 *Application*. 2005 Aug 1;30(4):252-64.
- 572 2. Yoder L. Explicit Logic Circuits Discriminate Neural States. *PloS one*. 2009  
573 Jan 7;4(1):e4154.
- 574 3. Yoder L. Explicit logic circuits predict local properties of the neocortex's  
575 physiology and anatomy. *PloS one*. 2010 Feb 16;5(2):e9227.
- 576 4. Yoder L. Neural Flip-Flops I: Short-Term  
577 Memory. *bioRxiv*. 2020 May 24:403196.
- 578 5. Yoder L. Neural Flip-Flops II: Short-Term Memory and  
579 Electroencephalography. *bioRxiv*. 2020 June 24:168419.
- 580 6. Kandel E, Schwartz J, Jessell T, Siegelbaum SA, Hudspeth AJ. *Principles of*  
581 *neural science*. McGraw-Hill Professional. New York, NY. 2013:160.
- 582 7. Eggermann E, Bayer L, Serafin M, Saint-Mleux B, Bernheim L, Machard D,  
583 Jones BE, Mühlethaler M. The wake-promoting hypocretin–orexin neurons are

- 584           in an intrinsic state of membrane depolarization. *Journal of Neuroscience*. 2003  
585           Mar 1;23(5):1557-62.
- 586           8. Selverston A. Stomatogastric ganglion. *Scholarpedia*. 2008 Apr 2;3(4):1661.
- 587           9. Bucher D, Taylor AL, Marder E. Central pattern generating neurons  
588           simultaneously express fast and slow rhythmic activities in the stomatogastric  
589           ganglion. *Journal of neurophysiology*. 2006 Jun 1;95(6):3617-32.
- 590           10. Marder E, Weimann JM. Modulatory control of multiple task processing in the  
591           stomatogastric nervous system. In *Neurobiology of motor programme selection*  
592           1992 Jan 1 (pp. 3-19). Pergamon.
- 593           11. Weimann JM, Marder E. Switching neurons are integral members of multiple  
594           oscillatory networks. *Current Biology*. 1994 Oct 1;4(10):896-902.
- 595           12. Weimann, J.M., Meyrand, P. and Marder, E., 1991. Neurons that form multiple  
596           pattern generators: identification and multiple activity patterns of gastric/pyloric  
597           neurons in the crab stomatogastric system. *Journal of Neurophysiology*, 65(1),  
598           pp.111-122.
- 599           13. Weimann, J.M., Marder, E., Evans, B.R.U.C.E. and Calabrese, R.L., 1993. The  
600           effects of SDRNFLRFamide and TNRNFLRFamide on the motor patterns of  
601           the stomatogastric ganglion of the crab *Cancer borealis*. *Journal of*  
602           *Experimental Biology*, 181(1), pp.1-26.
- 603           14. Weimann, J.M., Skiebe, P., Heinzl, H.G., Soto, C., Kopell, N., Jorge-Rivera,  
604           J.C. and Marder, E., 1997. Modulation of oscillator interactions in the crab  
605           stomatogastric ganglion by crustacean cardioactive peptide. *Journal of*  
606           *Neuroscience*, 17(5), pp.1748-1760.

- 607 15. Selverston AI, Russell DF, Miller JP, King DG. The stomatogastric nervous  
608 system: structure and function of a small neural network. *Progress in*  
609 *neurobiology*. 1976 Jan 1;7:215-89.
- 610 16. Nagy F, Cardi PA, Cournil IS. A rhythmic modulatory gating system in the  
611 stomatogastric nervous system of *Homarus gammarus*. I. Pyloric-related  
612 neurons in the commissural ganglia. *Journal of neurophysiology*. 1994 Jun  
613 1;71(6):2477-89.
